# Supplementary material
Source: publisher figshare collection journal article supplement (https://sage.figshare.com/ndownloader/files/18169517)
Supplement: Supplementary file 1 [file 18169517]

## Supplemental Online Appendix

### Variable Pay Systems and/or Collective Wage Bargaining? Complements or Substitutes?

Barbara Bechter, Nils Braakmann, and Bernd Brandl

**Table OA.1.** Collective Wage Bargaining and the Incidence of Variable Pay Systems (Sensitivity Tests on Basis of Different VCE Estimators)

|                                  | <i>Models</i>                                       |                      |                      |
|----------------------------------|-----------------------------------------------------|----------------------|----------------------|
|                                  | (a)                                                 | (b)                  | (c)                  |
|                                  | Probit with robust standard errors                  |                      |                      |
| Single-level bargaining          | −0.004<br>(0.028)                                   |                      |                      |
| Only company bargaining          |                                                     | 0.052<br>(0.034)     | 0.054<br>(0.034)     |
| Only sectoral bargaining         |                                                     | −0.027<br>(0.038)    | −0.032<br>(0.038)    |
| Only national bargaining         |                                                     | −0.118***<br>(0.044) | −0.113**<br>(0.044)  |
| Multilevel bargaining            | 0.114***<br>(0.035)                                 | 0.098***<br>(0.036)  |                      |
| Governed multilevel bargaining   |                                                     |                      | −0.009<br>(0.054)    |
| Ungoverned multilevel bargaining |                                                     |                      | 0.149***<br>(0.041)  |
|                                  | Probit with clustered standard errors (28 clusters) |                      |                      |
| Single-level bargaining          | −0.004<br>(0.032)                                   |                      |                      |
| Only company bargaining          |                                                     | 0.052<br>(0.034)     | 0.054<br>(0.035)     |
| Only sectoral bargaining         |                                                     | −0.027<br>(0.036)    | −0.032<br>(0.038)    |
| Only national bargaining         |                                                     | −0.118*<br>(0.067)   | −0.113*<br>(0.063)   |
| Multilevel bargaining            | 0.114**<br>(0.053)                                  | 0.098*<br>(0.053)    |                      |
| Governed multilevel bargaining   |                                                     |                      | −0.009<br>(0.102)    |
| Ungoverned multilevel bargaining |                                                     |                      | 0.149***<br>(0.051)  |
|                                  | LPM with parametric Moulton correction              |                      |                      |
| Single-level bargaining          | −0.004<br>(0.008)                                   |                      |                      |
| Only company bargaining          |                                                     | 0.012<br>(0.010)     | 0.013<br>(0.010)     |
| Only sectoral bargaining         |                                                     | −0.010<br>(0.012)    | −0.013<br>(0.012)    |
| Only national bargaining         |                                                     | −0.042***<br>(0.013) | −0.040***<br>(0.014) |

|                                  |                     |                     |                     |
|----------------------------------|---------------------|---------------------|---------------------|
| Multilevel bargaining            | 0.033***<br>(0.010) | 0.028***<br>(0.010) |                     |
| Governed multilevel bargaining   |                     |                     | −0.008<br>(0.015)   |
| Ungoverned multilevel bargaining |                     |                     | 0.047***<br>(0.012) |

---

*Notes:* The three models based on Table 2 in the article. 1) Probit with robust standard errors, 2) Probit with clustered standard errors (clustering on the 28 countries), and 3) a linear probability model with a parametric Moulton correction as suggested in Angrist and Pischke (*Mostly Harmless Econometrics: An Empiricist's Companion*, 2009).

**Table OA.2.** Collective Wage Bargaining and the Incidence of Variable Pay Systems (Leave-One-Country-Out Results)

| <i>Variable</i>                  | <i>Average<br/>coefficient</i> | <i>Median<br/>coefficient</i> | <i>Minimum<br/>coefficient</i> | <i>Maximum<br/>coefficient</i> | <i>% of estimates<br/>where coefficient is<br/>significant</i> |
|----------------------------------|--------------------------------|-------------------------------|--------------------------------|--------------------------------|----------------------------------------------------------------|
| Model (a)                        |                                |                               |                                |                                |                                                                |
| Single-level bargaining          | −0.001                         | −0.001                        | −0.005                         | 0.004                          | 0                                                              |
| Multilevel bargaining            | 0.033                          | 0.032                         | 0.027                          | 0.040                          | 100                                                            |
| Model (b)                        |                                |                               |                                |                                |                                                                |
| Only company bargaining          | 0.015                          | 0.015                         | 0.011                          | 0.020                          | 4                                                              |
| Only sectoral bargaining         | −0.008                         | −0.008                        | −0.012                         | −0.001                         | 0                                                              |
| Only national bargaining         | −0.034                         | −0.034                        | −0.041                         | −0.015                         | 96                                                             |
| Multilevel bargaining            | 0.028                          | 0.028                         | 0.022                          | 0.036                          | 100                                                            |
| Model (c)                        |                                |                               |                                |                                |                                                                |
| Only company bargaining          | 0.016                          | 0.016                         | 0.012                          | 0.021                          | 7                                                              |
| Only sectoral bargaining         | −0.009                         | −0.009                        | −0.015                         | −0.002                         | 0                                                              |
| Only national bargaining         | −0.032                         | −0.032                        | −0.040                         | −0.015                         | 93                                                             |
| Governed multilevel bargaining   | −0.003                         | −0.003                        | −0.028                         | 0.014                          | 0                                                              |
| Ungoverned multilevel bargaining | 0.043                          | 0.043                         | 0.037                          | 0.051                          | 100                                                            |

*Notes:* The leave-one-out (one country is left out) models are based on Table 2 in the article. The table shows the variation of the coefficient (and the significance) if one country is left out for all countries considered in the sample.

**Table OA.3.** Incidence (in Percentage) of Collective Bargaining Structure and Variable Pay: Country-Level Information

| <i>Country</i> | <i>Collective bargaining</i> |                     |                    |                      |                       |                            |                              | <i>Variable pay</i> |                           |                                |                         |
|----------------|------------------------------|---------------------|--------------------|----------------------|-----------------------|----------------------------|------------------------------|---------------------|---------------------------|--------------------------------|-------------------------|
|                | <i>None</i>                  | <i>Only company</i> | <i>Only sector</i> | <i>Only national</i> | <i>Any multilevel</i> | <i>Governed multilevel</i> | <i>Ungoverned multilevel</i> | <i>Any</i>          | <i>Payment by results</i> | <i>Performance-related pay</i> | <i>Team-related pay</i> |
| Belgium        | 15                           | 6                   | 33                 | 7                    | 40                    | 0                          | 40                           | 55                  | 37                        | 37                             | 35                      |
| Bulgaria       | 85                           | 10                  | 1                  | 1                    | 3                     | 0                          | 3                            | 68                  | 39                        | 47                             | 53                      |
| Czech Republic | 70                           | 24                  | 1                  | 0                    | 4                     | 0                          | 4                            | 91                  | 54                        | 78                             | 67                      |
| Denmark        | 27                           | 17                  | 14                 | 6                    | 36                    | 36                         | 0                            | 79                  | 44                        | 61                             | 51                      |
| Germany        | 36                           | 18                  | 23                 | 3                    | 19                    | 19                         | 0                            | 70                  | 36                        | 52                             | 47                      |
| Estonia        | 93                           | 5                   | 1                  | 0                    | 2                     | 0                          | 2                            | 88                  | 63                        | 55                             | 69                      |
| Ireland        | 45                           | 16                  | 3                  | 17                   | 19                    | 0                          | 19                           | 70                  | 36                        | 49                             | 44                      |
| Greece         | 11                           | 15                  | 11                 | 24                   | 39                    | 0                          | 39                           | 61                  | 33                        | 43                             | 36                      |
| Spain          | 8                            | 15                  | 39                 | 11                   | 28                    | 0                          | 28                           | 61                  | 42                        | 43                             | 43                      |
| France         | 25                           | 23                  | 11                 | 8                    | 33                    | 0                          | 33                           | 73                  | 39                        | 43                             | 58                      |
| Croatia        | 58                           | 27                  | 2                  | 2                    | 10                    | 0                          | 10                           | 56                  | 41                        | 45                             | 34                      |
| Italy          | 5                            | 4                   | 9                  | 60                   | 22                    | 0                          | 22                           | 61                  | 22                        | 44                             | 42                      |
| Cyprus         | 48                           | 24                  | 6                  | 4                    | 18                    | 0                          | 18                           | 55                  | 29                        | 40                             | 33                      |
| Latvia         | 94                           | 4                   | 1                  | 0                    | 1                     | 0                          | 1                            | 74                  | 30                        | 56                             | 48                      |
| Lithuania      | 84                           | 11                  | 1                  | 1                    | 4                     | 0                          | 4                            | 88                  | 73                        | 72                             | 69                      |
| Luxembourg     | 38                           | 23                  | 6                  | 8                    | 26                    | 0                          | 26                           | 70                  | 43                        | 48                             | 41                      |
| Hungary        | 80                           | 12                  | 2                  | 1                    | 5                     | 0                          | 5                            | 60                  | 28                        | 44                             | 35                      |
| Malta          | 77                           | 11                  | 0                  | 3                    | 9                     | 0                          | 9                            | 75                  | 52                        | 51                             | 37                      |
| Netherlands    | 34                           | 24                  | 14                 | 8                    | 20                    | 20                         | 0                            | 73                  | 40                        | 54                             | 54                      |
| Austria        | 15                           | 4                   | 57                 | 4                    | 21                    | 21                         | 0                            | 83                  | 55                        | 63                             | 62                      |
| Poland         | 51                           | 43                  | 2                  | 1                    | 4                     | 0                          | 4                            | 82                  | 44                        | 59                             | 63                      |
| Portugal       | 38                           | 6                   | 30                 | 6                    | 20                    | 0                          | 20                           | 59                  | 31                        | 41                             | 41                      |
| Romania        | 30                           | 59                  | 1                  | 3                    | 8                     | 0                          | 8                            | 68                  | 45                        | 48                             | 49                      |
| Slovenia       | 30                           | 32                  | 5                  | 11                   | 22                    | 0                          | 22                           | 87                  | 42                        | 79                             | 73                      |
| Slovakia       | 72                           | 20                  | 1                  | 1                    | 5                     | 0                          | 5                            | 91                  | 56                        | 59                             | 72                      |
| Finland        | 7                            | 5                   | 52                 | 9                    | 27                    | 27                         | 0                            | 88                  | 52                        | 55                             | 76                      |
| Sweden         | 12                           | 3                   | 19                 | 11                   | 54                    | 54                         | 0                            | 71                  | 35                        | 46                             | 54                      |
| UK             | 52                           | 32                  | 2                  | 4                    | 10                    | 0                          | 10                           | 71                  | 38                        | 47                             | 46                      |

**Table OA.4.** Collective Wage Bargaining and the Incidence of Variable Pay Systems (Analogous to Table 2 but with Company-Level Bargaining as Reference Category)

|                                         | <i>Models</i>       |                      |                      |
|-----------------------------------------|---------------------|----------------------|----------------------|
|                                         | (a)                 | (b)                  | (c)                  |
| <b>Differentiation between levels</b>   |                     |                      |                      |
| No collective bargaining                | 0.001<br>(0.008)    | −0.015<br>(0.010)    | −0.016<br>(0.010)    |
| Only sectoral bargaining                |                     | −0.023*<br>(0.012)   | −0.025**<br>(0.012)  |
| Only national bargaining                |                     | −0.049***<br>(0.013) | −0.048***<br>(0.014) |
| Multilevel bargaining                   | 0.034***<br>(0.009) | 0.013<br>(0.011)     |                      |
| <b>Differentiation in governability</b> |                     |                      |                      |
| Governed multilevel bargaining          |                     |                      | −0.018<br>(0.016)    |
| Ungoverned multilevel bargaining        |                     |                      | 0.027**<br>(0.012)   |
| Observations                            | 18,524              | 18,524               | 18,524               |

*Notes:* Probit average marginal effects, robust standard errors in parentheses. All estimates control for country fixed effects as well as further control variables, which are listed in Table A.2.

\*, \*\*, \*\*\* denote statistical significance on the 10%, 5% level, and 1% level, respectively.

**Table OA.5.** Collective Wage Bargaining and the Type of Variable Pay System (Analogous to Table 3 but Uses Trivariate Probit That Allows Errors to Be Correlated across Equations)

|                                         | <i>Models</i>                                               |                      |                      |
|-----------------------------------------|-------------------------------------------------------------|----------------------|----------------------|
|                                         | (a)                                                         | (b)                  | (c)                  |
| <b>Differentiation between levels</b>   | <b>Equation 1: Outcome is payment by results (PbR)</b>      |                      |                      |
| Single-level bargaining                 | −0.031<br>(0.026)                                           |                      |                      |
| Only company bargaining                 |                                                             | −0.009<br>(0.030)    | −0.007<br>(0.030)    |
| Only sectoral bargaining                |                                                             | −0.040<br>(0.036)    | −0.046<br>(0.036)    |
| Only national bargaining                |                                                             | −0.083**<br>(0.042)  | −0.079*<br>(0.042)   |
| Multilevel bargaining                   | 0.123***<br>(0.032)                                         | 0.117***<br>(0.032)  |                      |
| <b>Differentiation in governability</b> |                                                             |                      |                      |
| Governed multilevel bargaining          |                                                             |                      | 0.037<br>(0.048)     |
| Ungoverned multilevel bargaining        |                                                             |                      | 0.159***<br>(0.037)  |
| <b>Differentiation between levels</b>   | <b>Equation 2: Outcome is performance-related pay (PrP)</b> |                      |                      |
| Single-level bargaining                 | −0.011<br>(0.026)                                           |                      |                      |
| Only company bargaining                 |                                                             | 0.030<br>(0.031)     | 0.031<br>(0.031)     |
| Only <i>sectoral</i> bargaining         |                                                             | −0.055<br>(0.036)    | −0.057<br>(0.036)    |
| Only <i>national</i> bargaining         |                                                             | −0.068<br>(0.042)    | −0.065<br>(0.042)    |
| Multilevel bargaining                   | 0.151***<br>(0.033)                                         | 0.138***<br>(0.033)  |                      |
| <b>Differentiation in governability</b> |                                                             |                      |                      |
| Governed multilevel bargaining          |                                                             |                      | 0.103**<br>(0.048)   |
| Ungoverned multilevel bargaining        |                                                             |                      | 0.155***<br>(0.038)  |
| <b>Differentiation between levels</b>   | <b>Equation 3: Outcome is team-related pay (TrP)</b>        |                      |                      |
| Single-level bargaining                 | −0.043<br>(0.027)                                           |                      |                      |
| Only company bargaining                 |                                                             | 0.006<br>(0.031)     | 0.009<br>(0.031)     |
| Only sectoral bargaining                |                                                             | −0.073**<br>(0.037)  | −0.084**<br>(0.037)  |
| Only national bargaining                |                                                             | −0.140***<br>(0.043) | −0.132***<br>(0.043) |
| Multilevel bargaining                   | 0.101***<br>(0.033)                                         | 0.086**<br>(0.034)   |                      |
| Correlation errors Equation 1 and 2     | 0.35                                                        | 0.35                 | 0.35                 |
| Correlation errors Equations 1 and 3    | 0.35                                                        | 0.35                 | 0.34                 |
| Correlation errors Equations 2 and 3    | 0.48                                                        | 0.48                 | 0.48                 |
| Observations                            | 18,524                                                      | 18,524               | 18,524               |

*Notes:* Probit coefficients, robust standard errors in parentheses. See notes in Table 2, which apply also here. \*, \*\*, \*\*\* denote statistical significance on the 10%, 5%, and 1% level, respectively.
